# Supplementary material
Source: publisher figshare collection journal article supplement (https://gsajournals.figshare.com/articles/dataset/_/9891119)
Supplement: Supplementary file 1 [file 1]

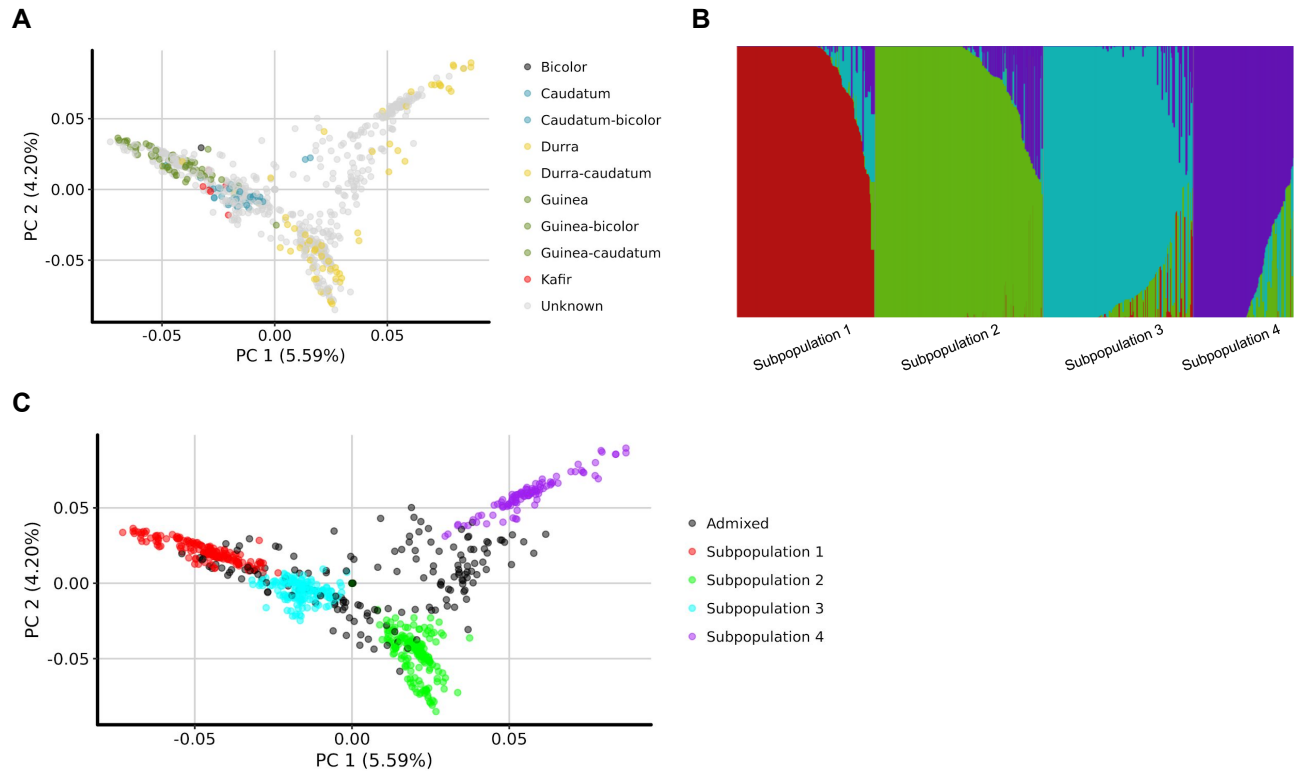

**Figure S1. Population structure analysis of the sorghum diversity panel.** (A) Principal component analysis (PCA) plot colored by sorghum lines with botanical race classifications (bicolor, caudatum, durra, guinea, kafir, and intermediates) as reported in the germplasm resources information network (GRIN, <https://www.ars-grin.gov/>). Lines with unknown race classifications are colored grey. (B) Distruct plot of fastSTRUCTURE subpopulation membership with K = 4. (C) PCA colored according to the fastSTRUCTURE subpopulation membership with K=4. Individuals with assignment values (Q) lower than 80% were designated as admixed (black dots). Population 1 predominantly contains individuals belonging to race guinea; population 3 mostly includes races kafir and caudatum; and populations 4 and 2 primarily have race durra (East Africa and India origins, respectively).

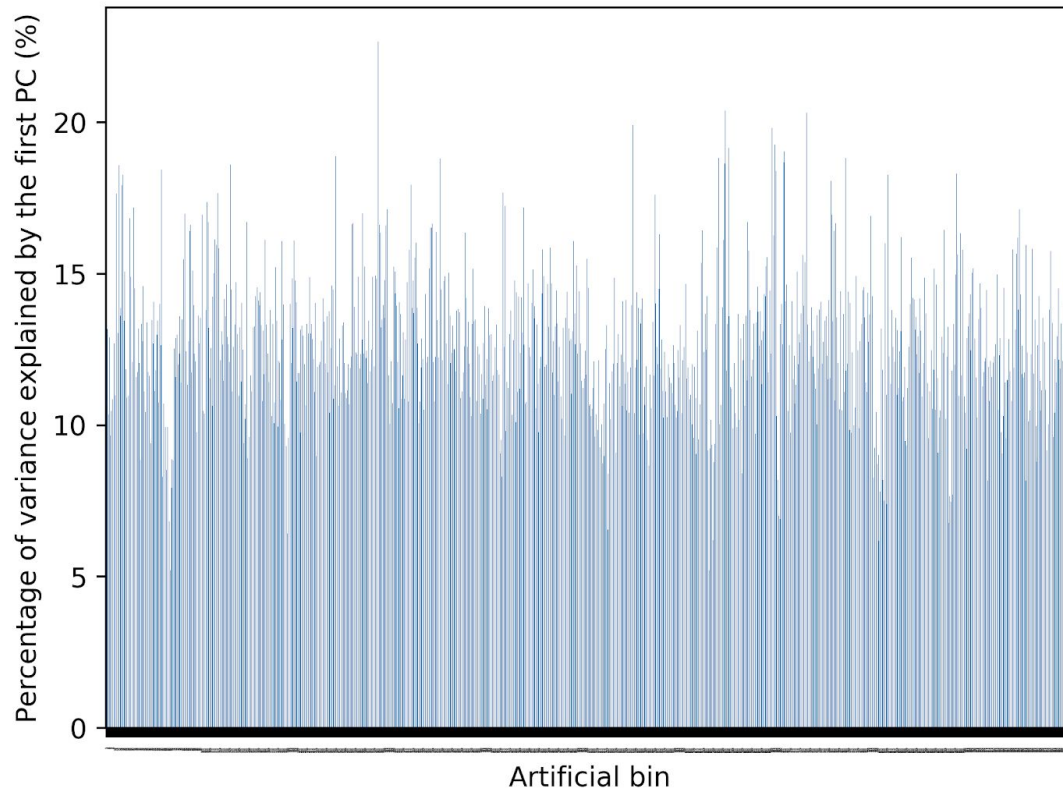

**Figure S2.** Distribution of the percentage (%) of the variance explained by the first principal component (PC) from each of 1,000 artificial bins. The artificial bins are ordered sequentially from the start of chromosome 1 to the end of chromosome 10.

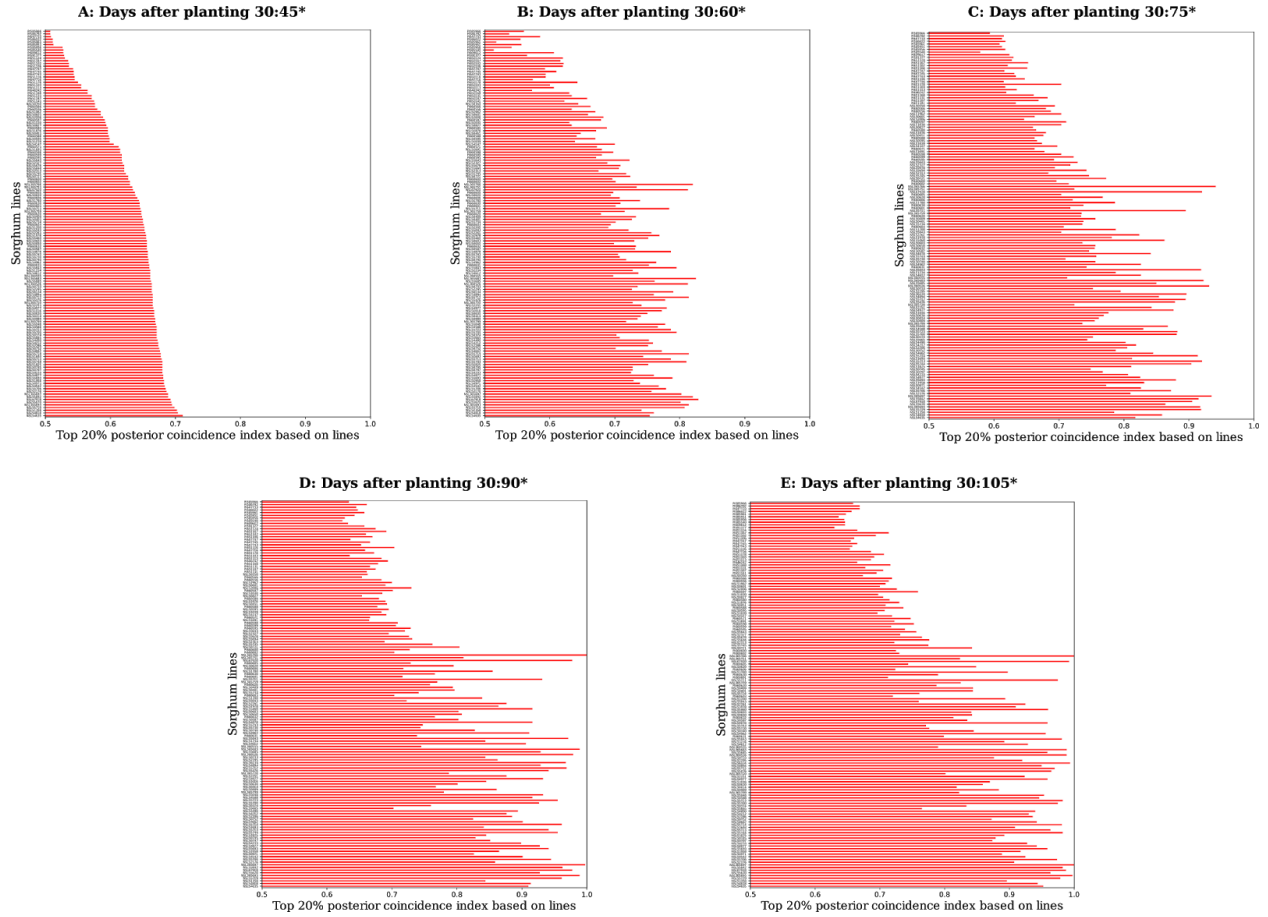

**Figure S3.** The calculated coincidence index based on lines (CIL) at multiple developmental stages. The top 20% posterior CILs from the results of the dynamic Bayesian network (DBN) are shown. The rank order of the lines in subplot A was fixed for subplots B, C, D, and E to understand phenotypic plasticity over time. Only lines with a CIL > 0.5 were plotted. The '\*' symbol denotes the days after planting (DAP) time point that was used to obtain the adjusted means.
